# Supplementary material for: Toll-like receptor-9 stimulated plasmacytoid dendritic cell precursors suppress autoimmune neuroinflammation in a murine model of multiple sclerosis
Source: PubMed Central journal article supplement (PMC7910458; doi:10.1038/s41598-021-84023-0), 2021-02-26
Supplement: 41598_2021_84023_MOESM1_ESM.pdf [file 41598_2021_84023_MOESM1_ESM.pdf]

**Toll-like receptor-9 stimulated plasmacytoid dendritic cell precursors suppress autoimmune neuroinflammation in a murine model of multiple sclerosis**

Hélène LETSCHER\*, Viviane A. AGBOGAN\*, Sarantis KORNIOTIS,  
Pauline GASTINEAU, Emmanuel TEJERINA, Christophe GRAS,  
Jérôme MEGRET, Alison MOE, William R. DROBYSKI and Flora ZAVALA

**Supplementary material**

## Supplementary Figure S1

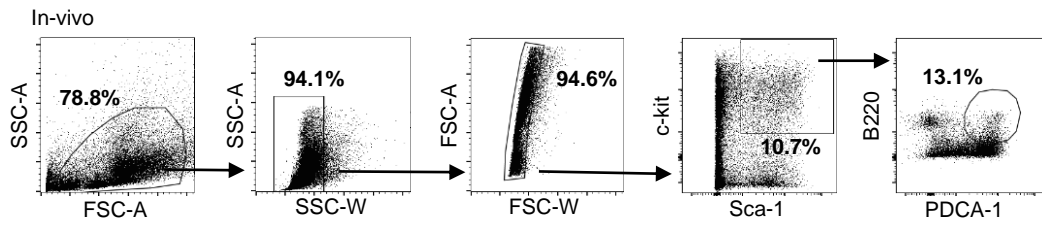

**Figure S1:** FACS cell sorting procedure of  $c\text{-kit}^+ \text{Sca-1}^+ \text{B220}^{\text{int}} \text{PDCA-1}^+$  cells recovered from  $c\text{-kit}^+$  cells magnetically selected from the BM of mice 18h after i.p. injection with 30  $\mu\text{g/ml}$  CpG-B.

## Supplementary Figure S2

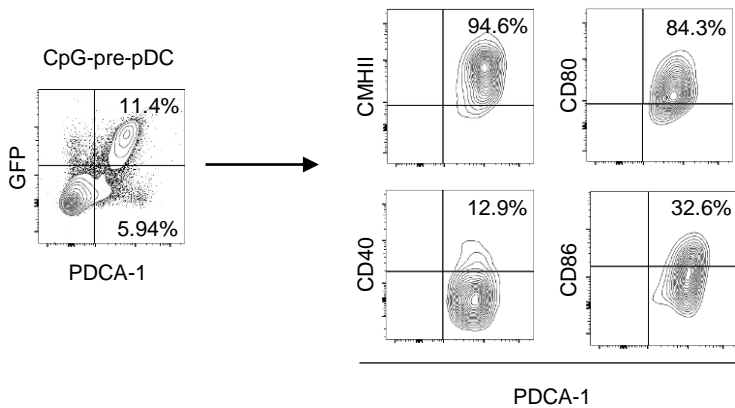

**Figure S2:** MHC-II and co-stimulatory markers expression in  $\text{GFP}^+$  CpG-pre-pDCs, adoptively transferred at d-12 and recovered at d-18 as  $\text{GFP}^+ \text{PDCA-1}^+$  cells from the spinal cord of EAE recipients.

### Supplementary Figure S3

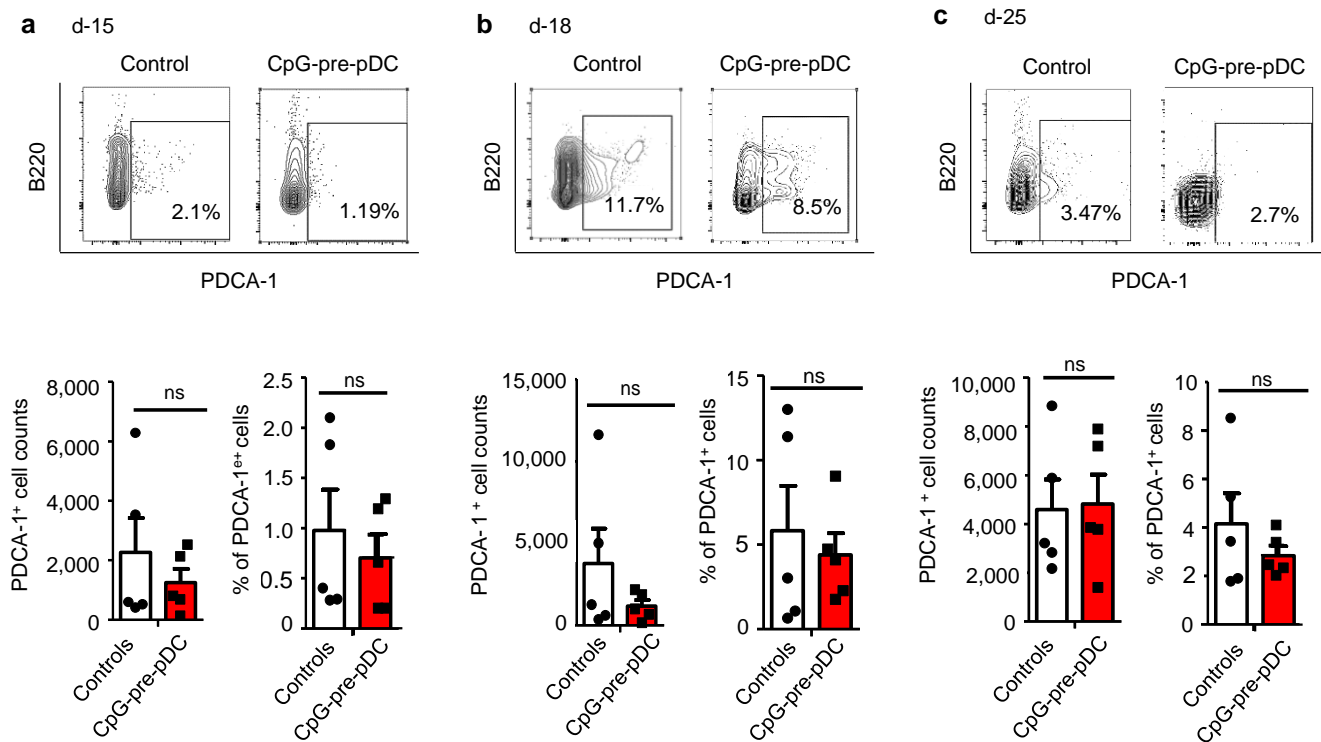

**Figure S3:** FACS analysis of B220<sup>+</sup> PDCA-1<sup>+</sup> cells in the spinal cord of mice immunized with EAE, either control or recipient of CpG-pre-pDCs adoptively transferred at d-12. Analysis was performed at day-15, day-18 and day-25 after immunization.

## Supplementary Figure S4

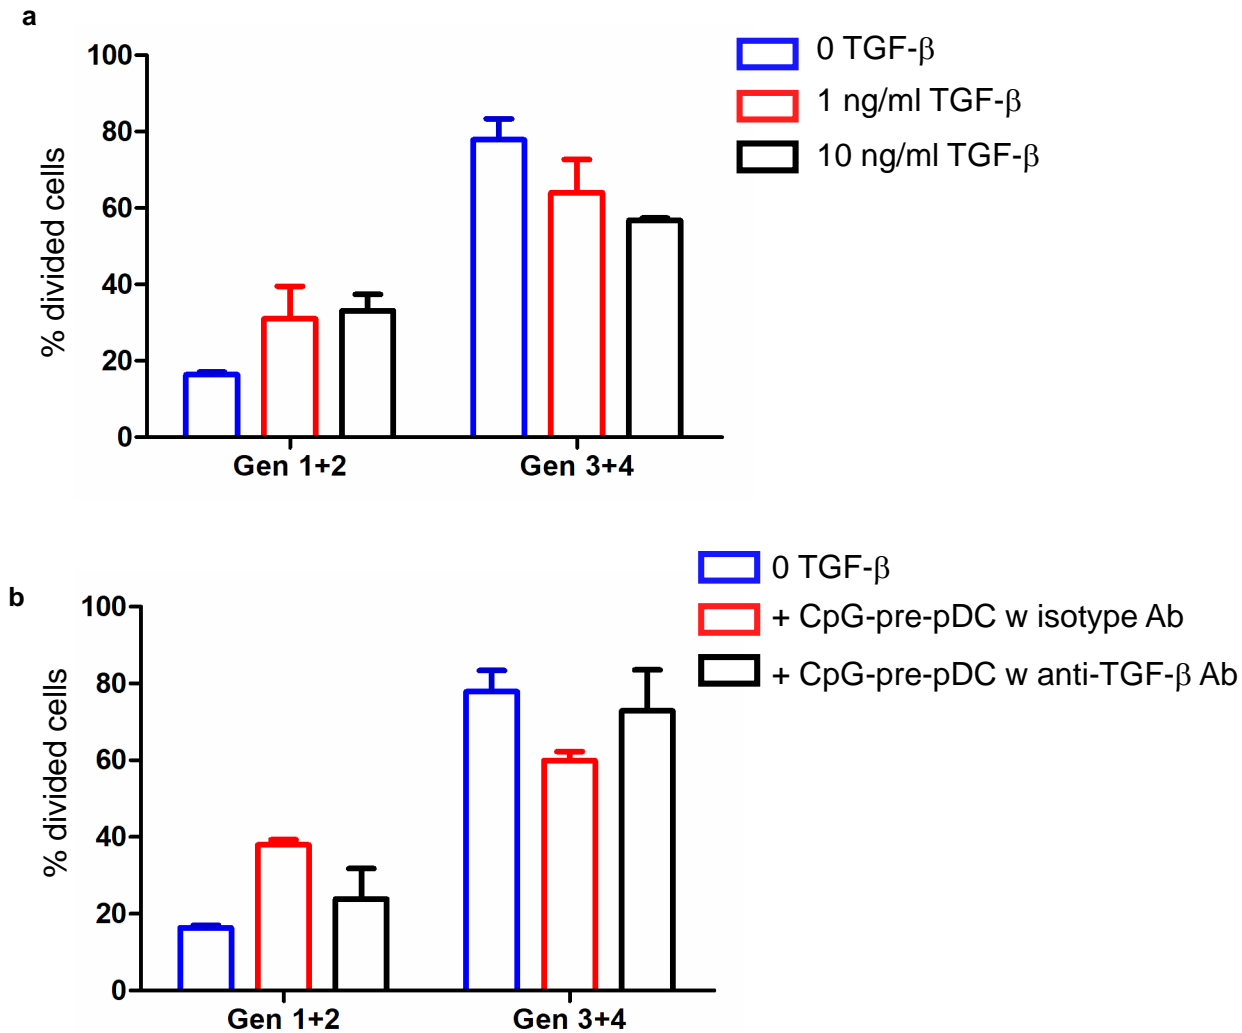

**Figure S4: Reduced biodetection of TGF- $\beta$  in lysates of CpG-pre-pDCs transfected with a neutralizing anti-TGF- $\beta$  antibody:** HT-2 cells were loaded with Cell Trace and stimulated with 7.5 ng/ml IL-4 for 48h. **(a) TGF- $\beta$  dose-dependent inhibition of the IL-4 dependent proliferation of the HT-2 cells.** Incubation with 0, 1 or 10 ng/ml recombinant TGF- $\beta$ . Inhibition of HT-2 proliferation is translated by enhanced cell proportions in generations 1+2 of divided cells and reduced proportions of cells in advanced generations 3+4. 2 cumulated experiments. **(b) Neutralization of TGF- $\beta$  bioactivity in anti-TGF- $\beta$  transfected pDC progenitors.** Incubation of HT-2 cells with or without (blue histograms) lysates of 50,000 cell-sorted CpG-pre-pDCs transfected with the Chariot vector coupled to an isotype Ab (red histograms) or to a TGF- $\beta$  neutralizing Ab (black histograms). Inhibition of HT-2 proliferation translated by enhanced generations 1+2 of cells in division show that the lysates of isotype Ab transfected progenitors (red histograms) contain TGF- $\beta$  bioactivity while the lysates of anti-TGF- $\beta$  transfected progenitors (black histograms) have reduced inhibitory activity, with percentages of cells in generations 1+2 close to levels observed in the absence of TGF- $\beta$  (in blue histograms). 2 cumulated experiments.

# Supplementary Figure S5

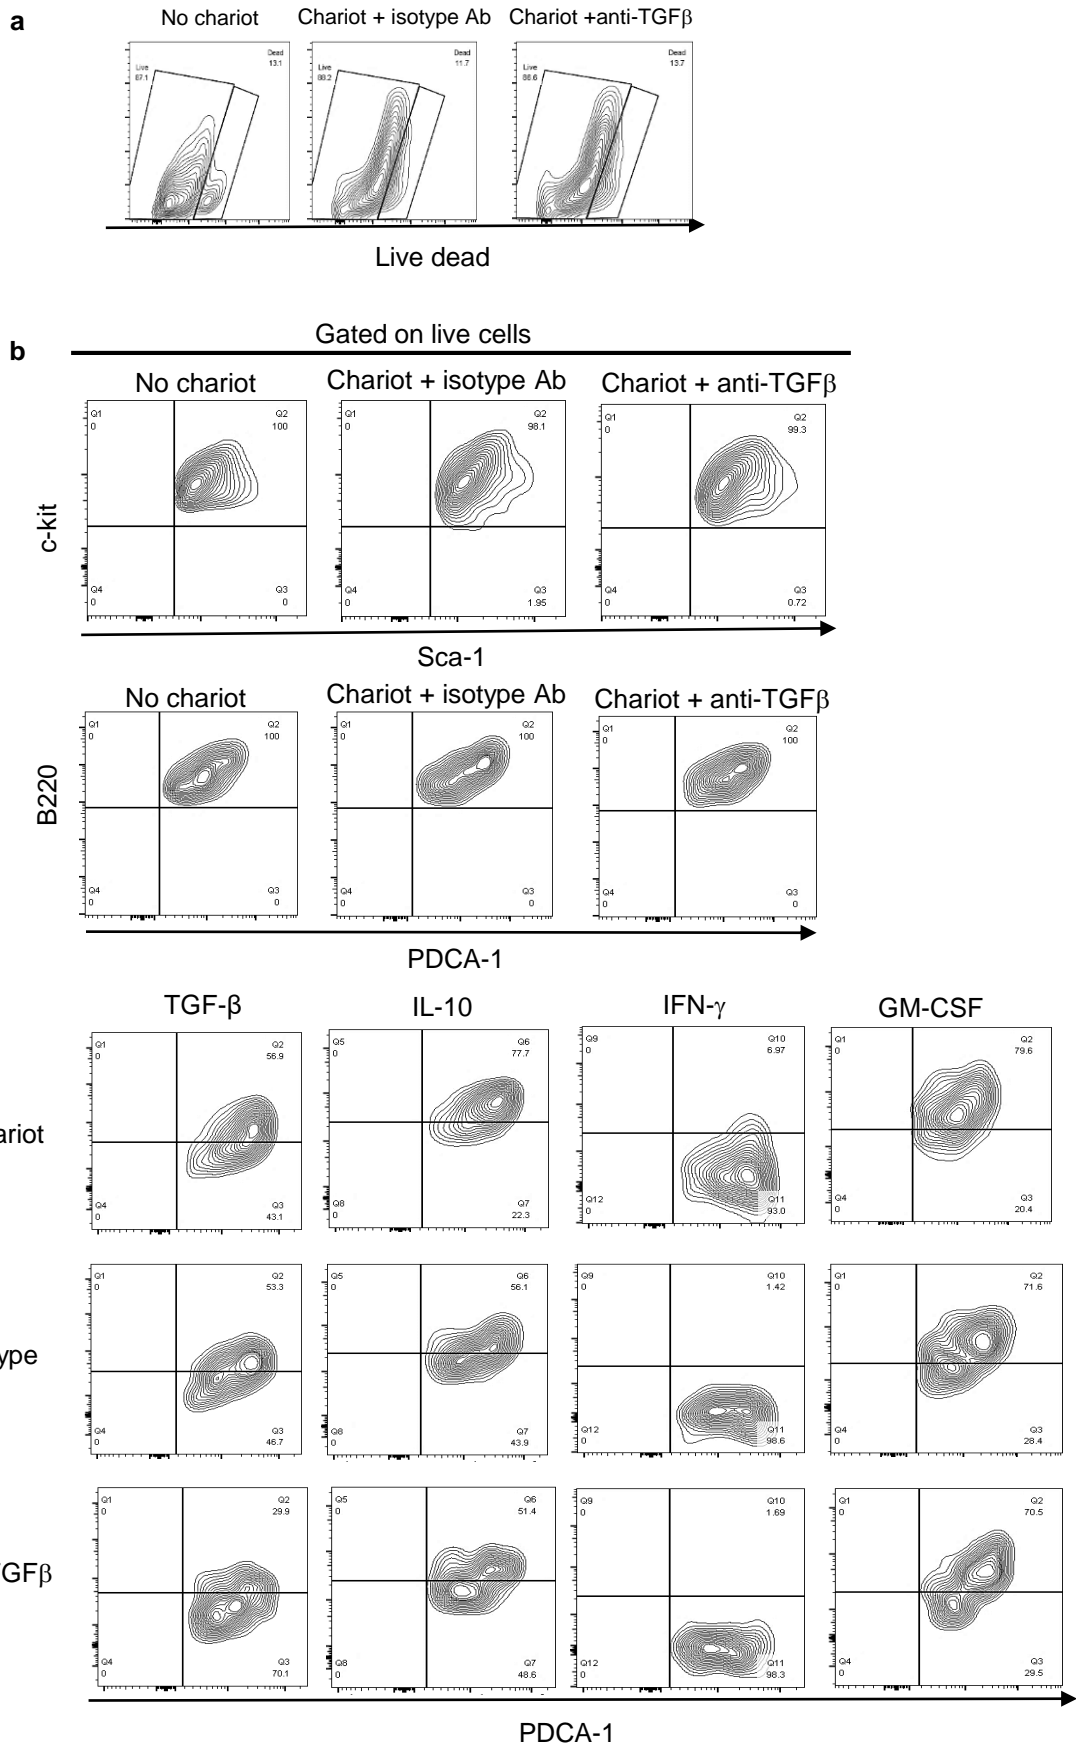

**Figure S5: The Chariot transfection system does not alter the viability, phenotype and functional properties of CpG-pre-pDCs.** Cell-sorted CpG-pre-pDCs were transfected (or not) with the Chariot vector complexed with either isotype Ab or anti-TGF $\beta$ . Cells were thereafter assessed for **(a)** Viability with Life dead staining, **(b)** Phenotype with c-kit, Sca-1, B220 and PDCA-1 staining and **(c)** Cytokine expression after 4h-activation with PMA + ionomycin + Golgi Stop.

## Supplementary Figure S6

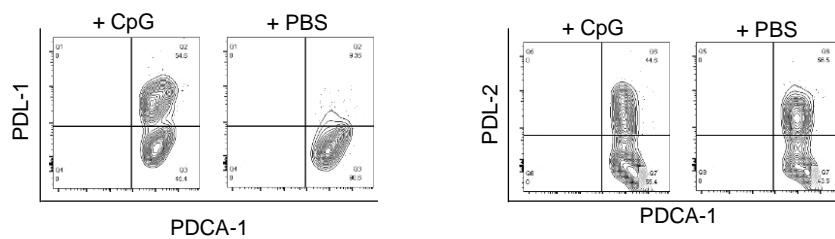

**Figure S6:** PDL-1 and PDL-2 expression, analyzed by flow cytometry, in cell-sorted CpG-versus PBS-pre-pDCs.
